# Supplementary material for: The Profile and All-Cause In-Hospital Mortality Dynamics of St-Segment Elevation Myocardial Infarction Patients during the Two Years of the COVID-19 Pandemic
Source: MDPI journal article supplement (doi:10.3390/jcm12041467), 2023-02-12
Supplement: s1 [file s1]

**Supplementary Table S1.** Multivariate logistic regression for mortality during COVID-19 pandemic.

| Variables                       | OR (95% CI)        | <i>p</i> -Value |
|---------------------------------|--------------------|-----------------|
| Need for mechanical ventilation | 29.7 (11.3–49.7)   | <0.0001         |
| Coronary lesions *              |                    |                 |
| One-vessel disease              |                    | 0.13            |
| Two-vessel disease              |                    | 0.08            |
| Three-vessel disease            | 21.04 (1.92–23.2)  | 0.01            |
| Left main disease               | 14.13 (1.42–139.4) | 0.02            |
| LVEF (increase by 1%)           | 0.96 (0.94–0.99)   | 0.02            |
| Revascularization **            |                    |                 |
| Primary PCI                     |                    | 0.001           |
| Salvage PCI                     | 0.08 (0.02–0.31)   | 0.002           |
| Elective PCI                    | 0.10 (0.02, 0.45)  | 0.46            |
| CABG                            |                    | 0.12            |
| COVID-19 infection              | 1.77 (1.23–2.2)    | <0.0001         |

CABG—coronary artery bypass graft; CI—confidence interval; COVID-19—coronavirus disease 2019; LVEF—left ventricular ejection fraction; OR—odd ratio. \* Reference group, no coronary lesions; \*\* reference group, no PCI.
